# Supplementary material
Source: PubMed Central journal article supplement (PMC6166133)

Figure EV 1C

SerCT

FLAG

Flag-Ser-CT 1 $\mu$ g  
pcDNA3.1 1 $\mu$ g  
Flag-Ser-CT 2 $\mu$ g  
pcDNA3.1 2 $\mu$ g

Flag-Ser-CT 1 $\mu$ g  
pcDNA3.1 1 $\mu$ g  
Flag-Ser-CT 2 $\mu$ g  
pcDNA3.1 2 $\mu$ g

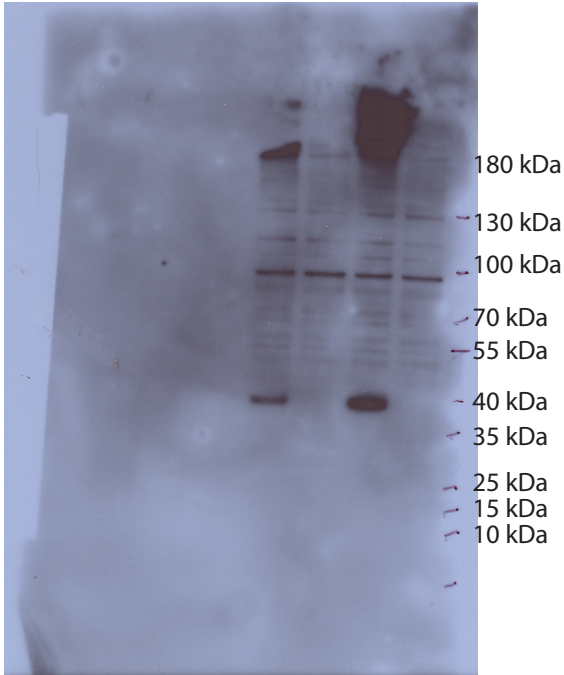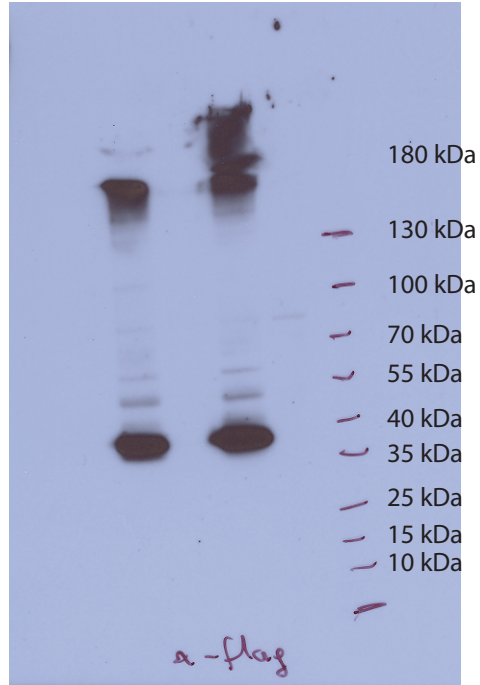

Supplement: EMBJ-37-e99023-s003.pdf [file EMBJ-37-e99023-s003.pdf]
