# Supplementary material
Source: PubMed Central journal article supplement (PMC6166133)

Figure 5C

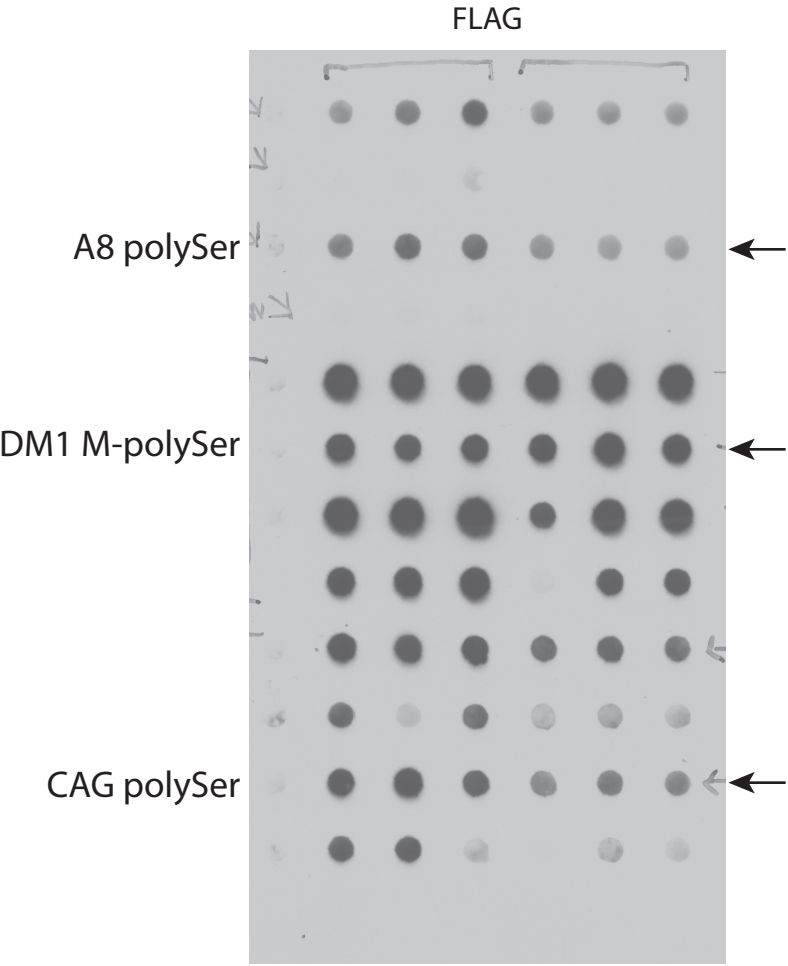

Figure 5E

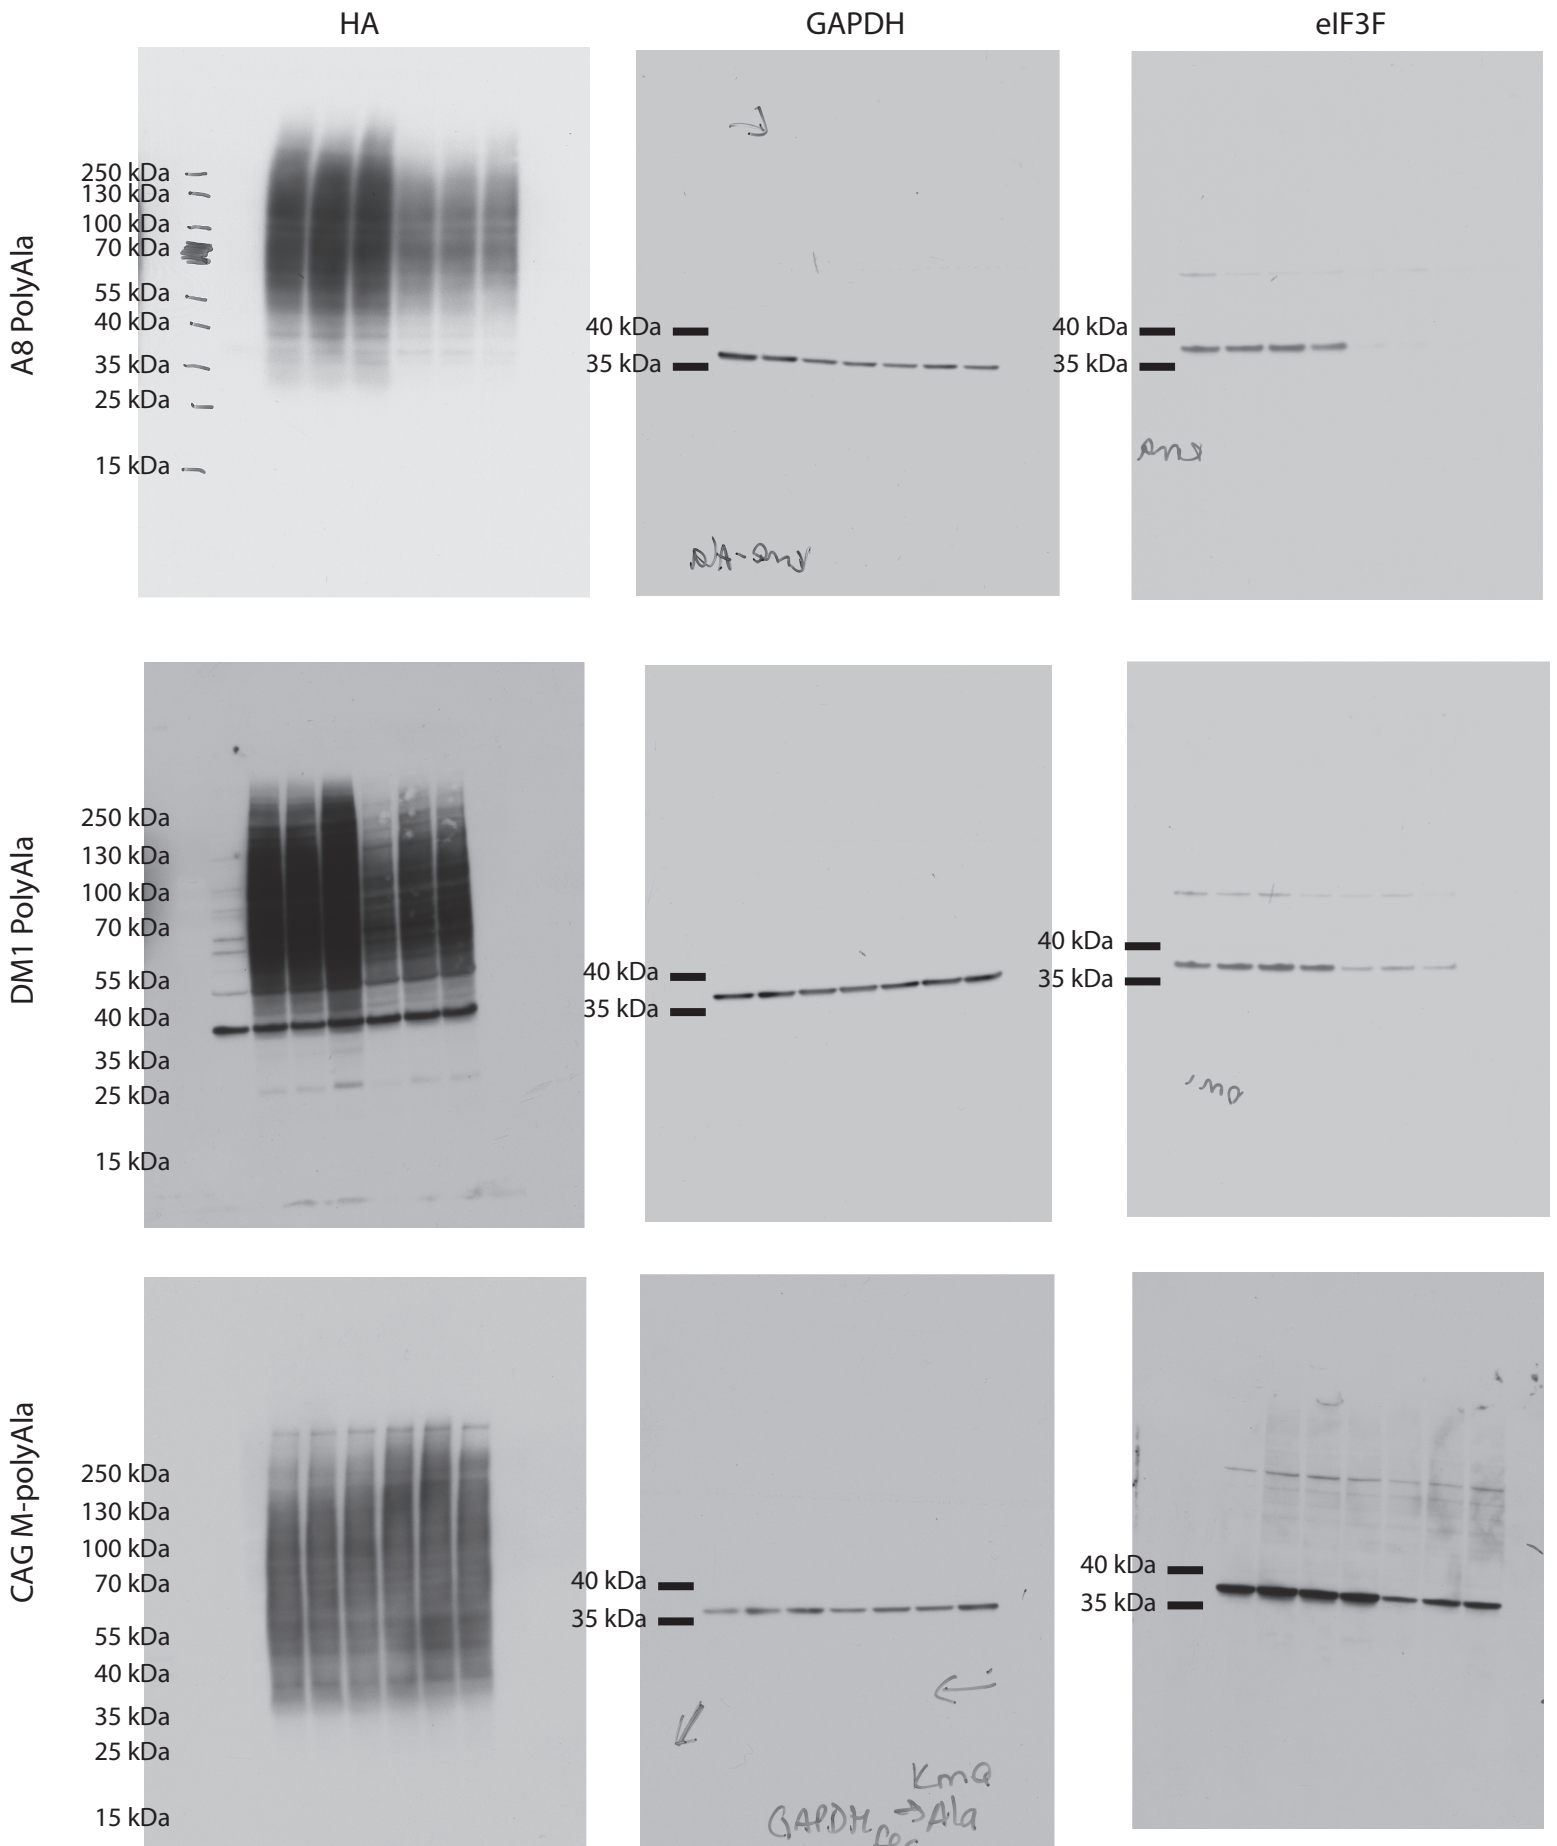

Figure 5F

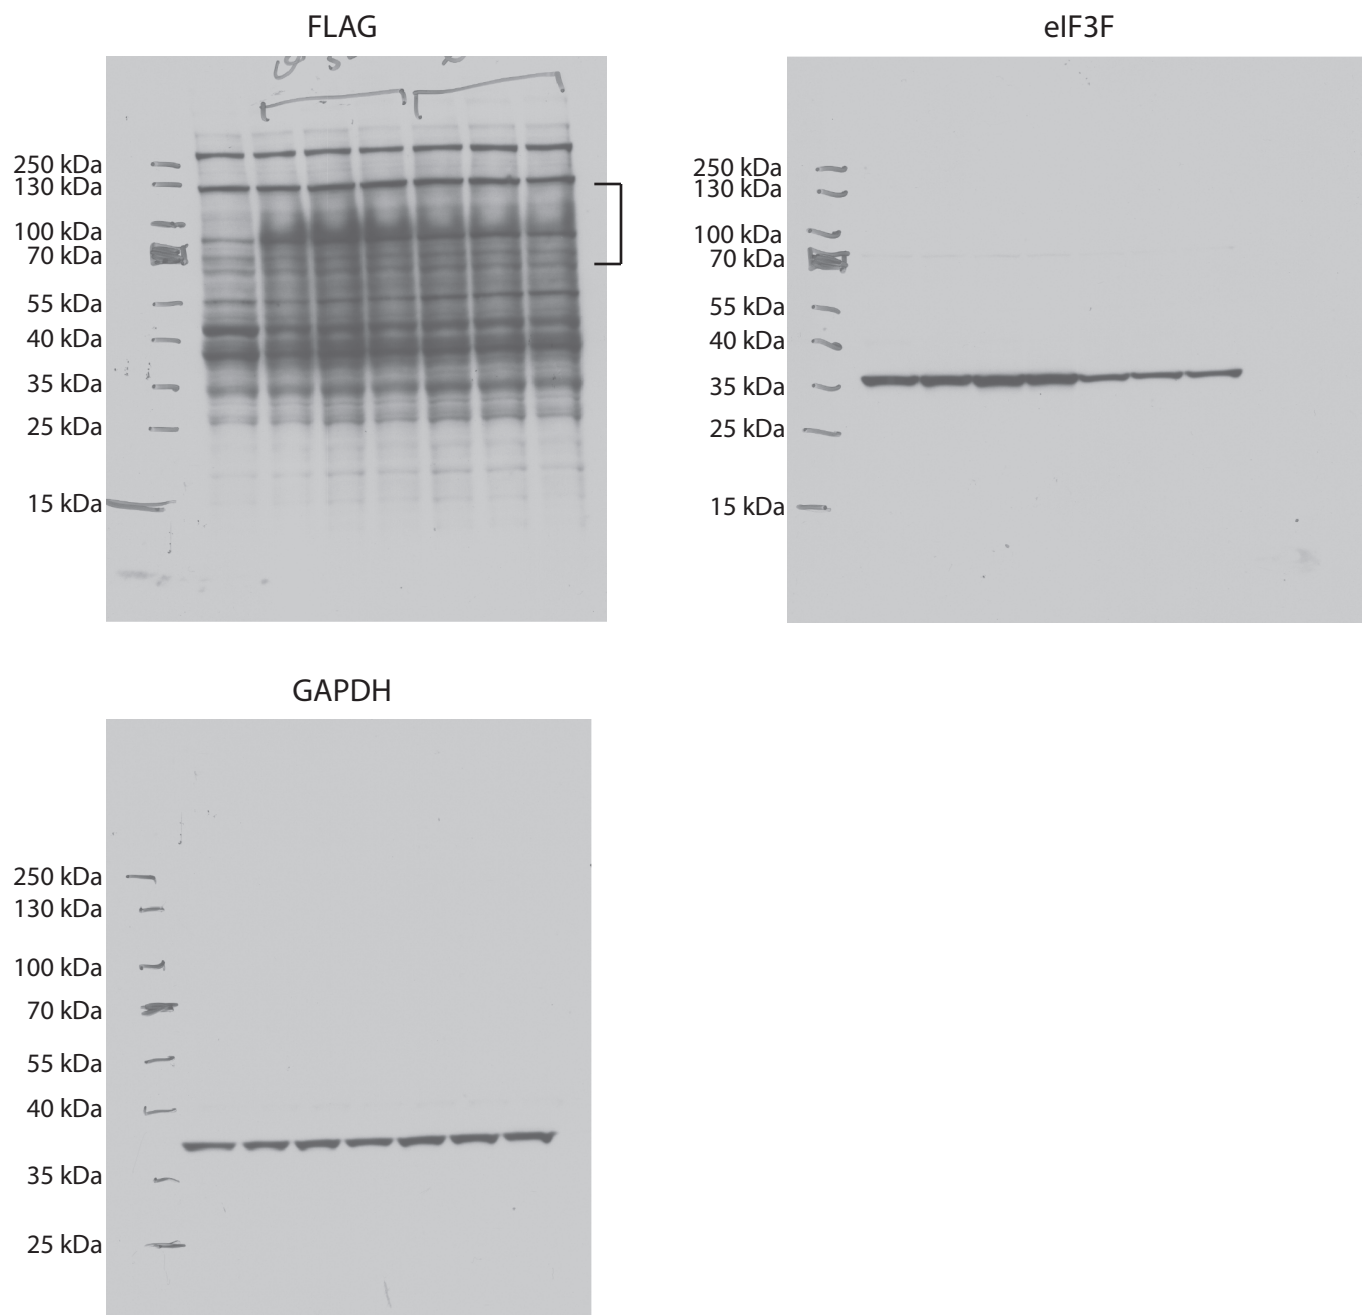

Supplement: EMBJ-37-e99023-s002.pdf [file EMBJ-37-e99023-s002.pdf]
